# Supplementary material
Source: PubMed Central journal article supplement (PMC10548311)
Supplement: jama-e2317002-s003.pdf [file jama-e2317002-s003.pdf]

\*First name, last name, and suffix (if applicable) are required and will appear in PubMed.

| <b>*Group Name(s): CKD Prognosis Consortium</b> |                   |                              |                  |                                                    |                                          |                                                         |                                                                                            |
|-------------------------------------------------|-------------------|------------------------------|------------------|----------------------------------------------------|------------------------------------------|---------------------------------------------------------|--------------------------------------------------------------------------------------------|
| <b>*First Name and Middle Initial(s)</b>        | <b>*Last Name</b> | <b>*Suffix (eg, Jr, III)</b> | Academic Degrees | Institution                                        | Location (city, state/province, country) | Role or Contribution, eg, chair, principal investigator | Group (if more than 1 Group listed in the byline) and/or Subgroup (eg, Steering Committee) |
| Lawrence J                                      | Appel             |                              | MD, MPH          | Johns Hopkins University School of Medicine        | Baltimore, MD                            | Cohort Chair                                            | AASK                                                                                       |
| Morgan                                          | Grams             |                              | MD, PhD          | New York University Grossman School of Medicine    | New York, NY                             | cohort investigator                                     | AASK                                                                                       |
| Mark                                            | Woodward          |                              | PhD              | George Institute, Australia, Oxford University, UK | Sydney, Australia and Oxford, UK         | cohort investigator                                     | ADVANCE                                                                                    |
| Katie                                           | Harris            |                              | PhD              | George Institute                                   | Sydney, Australia                        | cohort investigator                                     | ADVANCE                                                                                    |
| Hisatomi                                        | Arima             |                              | MD, PhD          | George Institute                                   | Sydney, Australia                        | cohort investigator                                     | ADVANCE                                                                                    |
| John                                            | Chalmers          |                              | MD, PhD          | George Institute                                   | Sydney, Australia                        | cohort investigator                                     | ADVANCE                                                                                    |
| Hiroshi                                         | Yatsuya           |                              | MD, PhD          | Nagoya University Graduate School of Medicine      | Nagoya, Japan                            | cohort investigator                                     | Aichi                                                                                      |
| Koji                                            | Tamakoshi         |                              | MD, PhD          | Nagoya University Graduate School of Medicine      | Nagoya, Japan                            | cohort investigator                                     | Aichi                                                                                      |
| Yuanying                                        | Li                |                              | PhD              | Nagoya University Graduate School of Medicine      | Nagoya, Japan                            | cohort investigator                                     | Aichi                                                                                      |
| Josef                                           | Coresh            |                              | MD, PhD          | Johns Hopkins Bloomberg School of Public Health    | Baltimore, MD                            | cohort investigator                                     | ARIC                                                                                       |
| Yingying                                        | Sang              |                              | MSc              | Johns Hopkins Bloomberg School of Public Health    | Baltimore, MD                            | cohort investigator                                     | ARIC                                                                                       |
| Kunihiro                                        | Matsushita        |                              | MD, PhD          | Johns Hopkins Bloomberg School of Public Health    | Baltimore, MD                            | cohort investigator                                     | ARIC                                                                                       |
| Morgan                                          | Grams             |                              | MD, PhD          | New York University Grossman School of Medicine    | New York, NY                             | cohort investigator                                     | ARIC                                                                                       |
| Kevan                                           | Polkinghorne      |                              | MD, PhD          | Monash Medical Centre                              | Melbourne, Australia                     | cohort investigator                                     | AusDiab                                                                                    |
| Steve                                           | Chadban           |                              | MD, PhD          | Royal Prince Alfred Hospital                       | Sydney, Australia                        | cohort investigator                                     | AusDiab                                                                                    |
| Adeera                                          | Levin             |                              | MD               | University of British Columbia                     | Vancouver, Canada                        | cohort investigator                                     | BC CKD                                                                                     |
| Ognjenka                                        | Djurdjevic        |                              | MSc              | British Columbia Provincial Renal Agency           | Vancouver, Canada                        | cohort investigator                                     | BC CKD                                                                                     |
| Mila                                            | Tang              |                              | MSc              | University of British Columbia                     | Vancouver, Canada                        | cohort investigator                                     | BC CKD                                                                                     |

## Supplemental Online Content: Nonauthor Collaborators

\*First name, last name, and suffix (if applicable) are required and will appear in PubMed.

| *First Name and Middle Initial(s) | *Last Name | *Suffix (eg, Jr, III) | Academic Degrees | Institution                                                                                                                              | Location (city, state/province, country) | Role or Contribution, eg, chair, principal investigator | Group (if more than 1 Group listed in the byline) and/or Subgroup (eg, Steering Committee) |
|-----------------------------------|------------|-----------------------|------------------|------------------------------------------------------------------------------------------------------------------------------------------|------------------------------------------|---------------------------------------------------------|--------------------------------------------------------------------------------------------|
| Luxia                             | Zhang      |                       | MD, MPH          | Renal Division, Department of Medicine, Peking University First Hospital. National Institute of Health Data Science at Peking University | Beijing, China                           | Cohort Co-Principal Investigator                        | Beijing                                                                                    |
| Fang                              | Wang       |                       | MD               | Renal Division, Department of Medicine, Peking University First Hospital                                                                 | Beijing, China                           | cohort investigator                                     | Beijing                                                                                    |
| Jinwei                            | Wang       |                       | PhD              | Renal Division, Department of Medicine, Peking University First Hospital                                                                 | Beijing, China                           | cohort investigator                                     | Beijing                                                                                    |
| Ming-Hui                          | Zhao       |                       | MD, PhD          | Renal Division, Department of Medicine, Peking University First Hospital                                                                 | Beijing, China                           | Cohort principal investigator                           | Beijing                                                                                    |
| Elke                              | Schaeffner |                       | MD, PhD          | Charité Universitätsmedizin Berlin                                                                                                       | Berlin, Germany                          | Cohort PI                                               | BIS                                                                                        |
| Natalie                           | Ebert      |                       | MD, PhD          | Charité Universitätsmedizin Berlin                                                                                                       | Berlin, Germany                          | Cohort Co-PI                                            | BIS                                                                                        |
| Nina                              | Mielke     |                       | MSc              | Charité Universitätsmedizin Berlin                                                                                                       | Berlin, Germany                          | cohort investigator                                     | BIS                                                                                        |
| Adeera                            | Levin      |                       | MD               | University of British Columbia                                                                                                           | Vancouver, Canada                        | cohort investigator                                     | CanPREDDICT                                                                                |
| Ognjenka                          | Djordjev   |                       | MSc              | British Columbia Provincial Renal Agency                                                                                                 | Vancouver, Canada                        | cohort investigator                                     | CanPREDDICT                                                                                |
| Mila                              | Tang       |                       | MSc              | University of British Columbia                                                                                                           | Vancouver, Canada                        | cohort investigator                                     | CanPREDDICT                                                                                |
| Marcello                          | Tonelli    |                       | MD SM<br>MSc     | University of Calgary                                                                                                                    | Calgary, Alberta, Canada                 | cohort investigator                                     | CARE                                                                                       |
| Anita                             | Lloyd      |                       | MSc              | University of Alberta                                                                                                                    | Edmonton, Alberta, Canada                | cohort investigator                                     | CARE                                                                                       |
| Frank                             | Sacks      |                       | MD               | Harvard School of Public Health                                                                                                          | Boston, MA, USA                          | cohort investigator                                     | CARE                                                                                       |
| Luxia                             | Zhang      |                       | MD, MPH          | Renal Division, Department of Medicine, Peking University First Hospital. National Institute of Health Data Science at Peking University | Beijing, China                           | Cohort Co-Principal Investigator                        | China NS                                                                                   |

## Supplemental Online Content: Nonauthor Collaborators

\*First name, last name, and suffix (if applicable) are required and will appear in PubMed.

| *First Name and Middle Initial(s) | *Last Name | *Suffix (eg, Jr, III) | Academic Degrees | Institution                                                                                         | Location (city, state/province, country) | Role or Contribution, eg, chair, principal investigator | Group (if more than 1 Group listed in the byline) and/or Subgroup (eg, Steering Committee) |
|-----------------------------------|------------|-----------------------|------------------|-----------------------------------------------------------------------------------------------------|------------------------------------------|---------------------------------------------------------|--------------------------------------------------------------------------------------------|
| Fang                              | Wang       |                       | MD               | Renal Division, Department of Medicine, Peking University First Hospital                            | Beijing, China                           | cohort investigator                                     | China NS                                                                                   |
| Jinwei                            | Wang       |                       | PhD              | Renal Division, Department of Medicine, Peking University First Hospital                            | Beijing, China                           | cohort investigator                                     | China NS                                                                                   |
| Ming-Hui                          | Zhao       |                       | MD, PhD          | Renal Division, Department of Medicine, Peking University First Hospital                            | Beijing, China                           | Cohort principal investigator                           | China NS                                                                                   |
| Michael G                         | Shlipak    |                       | MD               | University of California, San Francisco                                                             | San Francisco, CA                        | cohort investigator                                     | CHS                                                                                        |
| Nisha                             | Bansal     |                       | MD               | University of Washington                                                                            | Seattle, WA                              | cohort investigator                                     | CHS                                                                                        |
| Mark                              | Sarnak     |                       | MD               | Tufts University                                                                                    | Boston, MA                               | cohort investigator                                     | CHS                                                                                        |
| Kazumasa                          | Yamagishi  |                       | MD, PhD          | University of Tsukuba                                                                               | Tsukuba, Ibaraki, Japan                  | Collaborator                                            | CIRCS                                                                                      |
| Isao                              | Muraki     |                       | MD, PhD          | Osaka University                                                                                    | Suita, Osaka, Japan                      | Collaborator                                            | CIRCS                                                                                      |
| Yuji                              | Shimizu    |                       | MD, PhD          | Osaka Institute of Public Health                                                                    | Osaka, Japan                             | Collaborator                                            | CIRCS                                                                                      |
| Hiroyasu                          | Iso        |                       | MD, PhD          | National Center for Global Health and Medicine                                                      | Shinjuku, Tokyo, Japan                   | Cohort Principal Investigator                           | CIRCS                                                                                      |
| Masafumi                          | Fukagawa   |                       | MD, PhD          | Tokai University School of Medicine                                                                 | Isehara, Japan                           | cohort investigator                                     | CKD-JAC                                                                                    |
| Shoichi                           | Maruyama   |                       | MD, PhD          | Nagoya University Graduate School of Medicine                                                       | Nagoya, Japan                            | cohort investigator                                     | CKD-JAC                                                                                    |
| Takayuki                          | Hamano     |                       | MD, PhD          | Nagoya City University Graduate School of Medicine and Osaka University Graduate School of Medicine | Nagoya and Suita, Japan                  | cohort investigator                                     | CKD-JAC                                                                                    |
| Naohiko                           | Fujii      |                       | MD, PhD          | Hyogo Prefectural Nishinomiya Hospital                                                              | Nishinomiya, Japan                       | cohort investigator                                     | CKD-JAC                                                                                    |
| Takahiro                          | Imaizumi   |                       | MD, PhD          | Nagoya University Hospital and Nagoya University Graduate School of Medicine                        | Nagoya, Japan                            | cohort investigator                                     | CKD-JAC                                                                                    |

## Supplemental Online Content: Nonauthor Collaborators

\*First name, last name, and suffix (if applicable) are required and will appear in PubMed.

| *First Name and Middle Initial(s) | *Last Name       | *Suffix (eg, Jr, III) | Academic Degrees | Institution                                                                                                                                                              | Location (city, state/province, country) | Role or Contribution, eg, chair, principal investigator | Group (if more than 1 Group listed in the byline) and/or Subgroup (eg, Steering Committee) |
|-----------------------------------|------------------|-----------------------|------------------|--------------------------------------------------------------------------------------------------------------------------------------------------------------------------|------------------------------------------|---------------------------------------------------------|--------------------------------------------------------------------------------------------|
| Natalia                           | Alencar De Pinho |                       | PhD              | Centre for research in Epidemiology and Population Health (CESP), Paris-Saclay University, Inserm U1018, Versailles Saint-Quentin University, Clinical Epidemiology Team | Villejuif, France                        | Cohort Principal investigator                           | CKD-REIN                                                                                   |
| Marie                             | Metzger          |                       | PhD              | Centre for research in Epidemiology and Population Health (CESP), Paris-Saclay University, Inserm U1018, Versailles Saint-Quentin University, Clinical Epidemiology Team | Villejuif, France                        | In charge of the cohort's study data                    | CKD-REIN                                                                                   |
| Bénédicte                         | Stengel          |                       | PhD, MD          | Centre for research in Epidemiology and Population Health (CESP), Paris-Saclay University, Inserm U1018, Versailles Saint-Quentin University, Clinical Epidemiology Team | Villejuif, France                        | Cohort Steering committee member                        | CKD-REIN                                                                                   |
| Aghilès                           | Hamroun          |                       | PhD, MD          | Santé Publique – Epidémiologie, Néphrologie ; UMR1167 RIDAGE Institut Pasteur de Lille, Inserm, Univ Lille, CHU Lille, F-59000                                           | Lille, France                            | Cohort Steering committee member                        | CKD-REIN                                                                                   |

## Supplemental Online Content: Nonauthor Collaborators

\*First name, last name, and suffix (if applicable) are required and will appear in PubMed.

| *First Name and Middle Initial(s) | *Last Name | *Suffix (eg, Jr, III) | Academic Degrees | Institution                                                                                                                                                                                                                                                             | Location (city, state/province, country)              | Role or Contribution, eg, chair, principal investigator | Group (if more than 1 Group listed in the byline) and/or Subgroup (eg, Steering Committee) |
|-----------------------------------|------------|-----------------------|------------------|-------------------------------------------------------------------------------------------------------------------------------------------------------------------------------------------------------------------------------------------------------------------------|-------------------------------------------------------|---------------------------------------------------------|--------------------------------------------------------------------------------------------|
| Ziad                              | Massy      |                       | PhD, MD, FRA     | Hôpital Universitaire Ambroise Paré, APHP, Department de Nephrologie<br><br>Centre for research in Epidemiology and Population Health (CESP), Paris-Saclay University, Inserm U1018, Versailles Saint-Quentin University, Clinical Epidemiology Team, Villejuif, France | Boulogne Billancourt, France<br><br>Villejuif, France | Cohort Steering committee member                        | CKD-REIN                                                                                   |
| Tazeen H                          | Jafar      |                       | MD               | Duke-NUS Medical School, Singapore; Duke University                                                                                                                                                                                                                     | Singapore and Durham, North Carolina                  | Cohort principal investigator                           | COBRA                                                                                      |
| Imtiaz                            | Jehan      |                       | MBBS             | Aga Khan University                                                                                                                                                                                                                                                     | Karachi, Pakistan                                     | cohort investigator                                     | COBRA                                                                                      |
| Juanita                           | Hatcher    |                       | PhD              | Aga Khan University                                                                                                                                                                                                                                                     | Karachi, Pakistan                                     | cohort investigator                                     | COBRA                                                                                      |
| Nish                              | Chaturvedi |                       | MD               | University College London                                                                                                                                                                                                                                               | London, UK                                            | cohort investigator                                     | COBRA                                                                                      |
| Neil                              | Poulter    |                       | MD               | Imperial College London                                                                                                                                                                                                                                                 | London, UK                                            | cohort investigator                                     | COBRA                                                                                      |
| David C                           | Wheeler    |                       | MD               | University College London                                                                                                                                                                                                                                               | London, UK                                            | cohort investigator                                     | CRIB                                                                                       |
| Martin                            | Landray    |                       | PhD              | University of Oxford                                                                                                                                                                                                                                                    | Oxford, UK                                            | cohort investigator                                     | CRIB                                                                                       |
| Amanda                            | Anderson   |                       | PhD, MPH         | Tulane University School of Public Health and Tropical Medicine                                                                                                                                                                                                         | New Orleans, LA                                       | Cohort Multiple PI                                      | CRIC                                                                                       |
| Jing                              | Chen       |                       | MD, MMSc, MSc    | Tulane University School of Medicine                                                                                                                                                                                                                                    | New Orleans, LA                                       | Cohort PI                                               | CRIC                                                                                       |
| James                             | Lash       |                       | MD               | University of Illinois at Chicago College of Medicine                                                                                                                                                                                                                   | Chicago, IL                                           | Cohort PI                                               | CRIC                                                                                       |
| Jon                               | Taliercio  |                       | DO               | Cleveland Clinic                                                                                                                                                                                                                                                        | Cleveland, OH                                         | Cohort Co-Investigator                                  | CRIC                                                                                       |
| Peter (Wei)                       | Yang       |                       | PhD              | University of Pennsylvania Perelman School of Medicine                                                                                                                                                                                                                  | Philadelphia, PA                                      | Cohort Co-Investigator                                  | CRIC                                                                                       |

## Supplemental Online Content: Nonauthor Collaborators

\*First name, last name, and suffix (if applicable) are required and will appear in PubMed.

| *First Name and Middle Initial(s) | *Last Name   | *Suffix (eg, Jr, III) | Academic Degrees | Institution                                                                                       | Location (city, state/province, country) | Role or Contribution, eg, chair, principal investigator | Group (if more than 1 Group listed in the byline) and/or Subgroup (eg, Steering Committee) |
|-----------------------------------|--------------|-----------------------|------------------|---------------------------------------------------------------------------------------------------|------------------------------------------|---------------------------------------------------------|--------------------------------------------------------------------------------------------|
| Lawrence J                        | Appel        |                       | MD, MPH          | Johns Hopkins University School of Medicine                                                       | Baltimore, MD                            | Cohort PI                                               | CRIC                                                                                       |
| Katherine                         | Tuttle       |                       | MD               | Providence St Joseph Health, Providence                                                           | Spokane, WA                              | cohort co-PI                                            | CURE-CKD                                                                                   |
| Radica                            | Alicic       |                       | MD               | Providence St Joseph Health, Providence                                                           | Spokane, WA                              | cohort investigator                                     | CURE-CKD                                                                                   |
| Susanne                           | Nicholas     |                       | MD               | UCLA                                                                                              | Los Angeles, CA                          | cohort investigator                                     | CURE-CKD                                                                                   |
| Jenny                             | Shen         |                       | MD               | Lundquist Institute at Harbor-UCLA Medical Center                                                 | Torrance, CA                             | cohort investigator                                     | CURE-CKD                                                                                   |
| Ben                               | Schöttker    |                       | PhD, MPH, MSc    | German Cancer Research Center                                                                     | Heidelberg, Germany                      | Cohort Study Coordinator                                | ESTHER                                                                                     |
| Hannah                            | Stocker      |                       | PhD, MPH         | Network Aging Research, Heidelberg University                                                     | Heidelberg, Germany                      | Cohort Postdoctoral researcher                          | ESTHER                                                                                     |
| Dietrich                          | Rothenbacher |                       | MD, MPH          | Institute of Epidemiology and Medical Biometry, Ulm University                                    | Ulm, Germany                             | Cohort Chair                                            | ESTHER                                                                                     |
| Hermann                           | Brenner      |                       | MD, MPH          | German Cancer Research Center (DKFZ)                                                              | Heidelberg, Germany                      | Cohort Principal Investigator                           | ESTHER                                                                                     |
| Daniel                            | Levy         |                       | MD               | Population Sciences Branch, National Heart Lung and Blood Institute, National Institute of Health | Framingham MA                            | cohort investigator                                     | Framingham                                                                                 |
| Shih-Jen                          | Hwang        |                       | PhD              | Population Sciences Branch, National Heart Lung and Blood Institute, National Institute of Health | Framingham MA                            | cohort investigator                                     | Framingham                                                                                 |
| Markus P                          | Schneider    |                       | MD               | Department of Nephrology and Hypertension, University Hospital Erlangen                           | Erlangen, Germany                        | cohort investigator                                     | GCKD                                                                                       |
| Anna                              | Köttgen      |                       | MD MPH           | Medical Center - University of Freiburg                                                           | Freiburg, Germany                        | cohort investigator                                     | GCKD                                                                                       |
| Heike                             | Meiselbach   |                       | PhD              | Department of Nephrology and Hypertension, University Hospital Erlangen                           | Erlangen, Germany                        | cohort coordinator                                      | GCKD                                                                                       |

## Supplemental Online Content: Nonauthor Collaborators

\*First name, last name, and suffix (if applicable) are required and will appear in PubMed.

| *First Name and Middle Initial(s) | *Last Name | *Suffix (eg, Jr, III) | Academic Degrees | Institution                                                                                                                                                      | Location (city, state/province, country) | Role or Contribution, eg, chair, principal investigator | Group (if more than 1 Group listed in the byline) and/or Subgroup (eg, Steering Committee) |
|-----------------------------------|------------|-----------------------|------------------|------------------------------------------------------------------------------------------------------------------------------------------------------------------|------------------------------------------|---------------------------------------------------------|--------------------------------------------------------------------------------------------|
| Kai-Uwe                           | Eckardt    |                       | MD               | Department of Nephrology and Hypertension, University Hospital Erlangen; Department of Nephrology and Medical Intensive Care, Charité-Universitätsmedizin Berlin | Erlangen and Berlin, Germany             | cohort principal investigator                           | GCKD                                                                                       |
| Alexander R                       | Chang      |                       | MD, MS           | Geisinger                                                                                                                                                        | Danville, PA, USA                        | cohort investigator                                     | Geisinger                                                                                  |
| Jamie A                           | Green      |                       | MD, MS           | Geisinger                                                                                                                                                        | Danville, PA, USA                        | cohort investigator                                     | Geisinger                                                                                  |
| H Lester                          | Kirchner   |                       | PhD              | Geisinger                                                                                                                                                        | Danville, PA, USA                        | cohort investigator                                     | Geisinger                                                                                  |
| Gurmukteshwar                     | Singh      |                       | MD               | Geisinger                                                                                                                                                        | Danville, PA, USA                        | cohort investigator                                     | Geisinger                                                                                  |
| Simon                             | Sawhney    |                       | MBChB, PHD       | University of Aberdeen                                                                                                                                           | Aberdeen                                 | Cohort Principal Investigator                           | GLOMMS                                                                                     |
| Corri                             | Black      |                       | MBChB, PHD       | University of Aberdeen                                                                                                                                           | Aberdeen                                 | Cohort Chair                                            | GLOMMS                                                                                     |
| Katie                             | Wilde      |                       | MMaths           | University of Aberdeen                                                                                                                                           | Aberdeen                                 | Cohort Safe Haven Director                              | GLOMMS                                                                                     |
| Angharad                          | Marks      |                       | MBChB, PHD       | University of Aberdeen                                                                                                                                           | Aberdeen                                 | Cohort Researcher                                       | GLOMMS                                                                                     |
| Samira                            | Bell       |                       | MBChB, MD        | University of Dundee                                                                                                                                             | Dundee, UK                               | Cohort co-investigator                                  | Go-DARTS                                                                                   |
| Moneeza                           | Siddiqui   |                       | PhD              | University of Dundee                                                                                                                                             | Dundee, UK                               | Cohort co-investigator                                  | Go-DARTS                                                                                   |
| Colin                             | Palmer     |                       | PhD              | University of Dundee                                                                                                                                             | Dundee, UK                               | Cohort co-investigator                                  | Go-DARTS                                                                                   |
| Ewan                              | Pearson    |                       | PhD              | University of Dundee                                                                                                                                             | Dundee, UK                               | Cohort co-investigator                                  | Go-DARTS                                                                                   |
| Mariko                            | Miyazaki   |                       | MD, PhD          | Tohoku University, Graduate School of Medicine                                                                                                                   | Sendai, Japan                            | cohort investigator                                     | Gonryo                                                                                     |
| Masaaki                           | Nakayama   |                       | MD, PhD          | St. Luca's International Hospital                                                                                                                                | Tokyo, Japan                             | cohort investigator                                     | Gonryo                                                                                     |
| Tae                               | Yamamoto   |                       | MD, PhD          | Sendai City Hospital                                                                                                                                             | Sendai, Japan                            | cohort investigator                                     | Gonryo                                                                                     |
| Gen                               | Yamada     |                       | MD, PhD          | Tohoku University, Graduate School of Medicine                                                                                                                   | Sendai, Japan                            | cohort investigator                                     | Gonryo                                                                                     |
| Sadayoshi                         | Ito        |                       | MD, PhD          | Katta General Hospital                                                                                                                                           | Shiroishi, Japan                         | cohort investigator                                     | Gonryo                                                                                     |
| Massimo                           | Cirillo    |                       | MD               | University of Salerno                                                                                                                                            | Salerno, Italy                           | cohort investigator                                     | Gubbio                                                                                     |

## Supplemental Online Content: Nonauthor Collaborators

\*First name, last name, and suffix (if applicable) are required and will appear in PubMed.

| *First Name and Middle Initial(s) | *Last Name  | *Suffix (eg, Jr, III) | Academic Degrees | Institution                                                                                          | Location (city, state/province, country) | Role or Contribution, eg, chair, principal investigator | Group (if more than 1 Group listed in the byline) and/or Subgroup (eg, Steering Committee) |
|-----------------------------------|-------------|-----------------------|------------------|------------------------------------------------------------------------------------------------------|------------------------------------------|---------------------------------------------------------|--------------------------------------------------------------------------------------------|
| Angela Yee-Moon                   | Wang        |                       | MD, PhD          | Queen Mary Hospital, University of Hong Kong                                                         | Hong Kong SAR, China                     | Cohort Principal investigator                           | Hong Kong CKD                                                                              |
| Henry Hon-Lin                     | Wu          |                       | MBCHB            | University of Hong Kong                                                                              | Hong Kong SAR, China                     | cohort investigator                                     | Hong Kong CKD                                                                              |
| Hoi Ching                         | Cheung      |                       | MBBS             | University of Hong Kong                                                                              | Hong Kong SAR, China                     | cohort investigator                                     | Hong Kong CKD                                                                              |
| Victoria                          | Ngai        |                       | BSC              | University of Hong Kong                                                                              | Hong Kong SAR, China                     | cohort investigator                                     | Hong Kong CKD                                                                              |
| Tang Ka                           | Tak         |                       | MPH              | University of Hong Kong                                                                              | Hong Kong SAR, China                     | cohort investigator                                     | Hong Kong CKD                                                                              |
| Amit X                            | Garg        |                       | MD, PhD          | ICES, Ontario, Canada, Western University and London Health Sciences Centre, London, Ontario, Canada | Ontario, Canada                          | cohort investigator                                     | ICES-KDT                                                                                   |
| Eric                              | McArthur    |                       | MSc              | ICES, Ontario, Canada and London Health Sciences Centre, London, Ontario, Canada                     | Ontario, Canada                          | cohort investigator                                     | ICES-KDT                                                                                   |
| Ann                               | Young       |                       | MD, PhD          | ICES, Ontario, Canada, Unity Health and the University of Toronto, Toronto, Ontario, Canada          | Ontario, Canada                          | cohort investigator                                     | ICES-KDT                                                                                   |
| Vivekanand                        | Jha         |                       | MD, DM           | George Institute for Global Health India                                                             | New Delhi, India                         | Cohort PI                                               | ICKD                                                                                       |
| Ashok Kumar                       | Yadav       |                       | PhD              | Postgraduate Institute of Medical Education and Research                                             | Chandigarh, India                        | Cohort investigator                                     | ICKD                                                                                       |
| Vivek                             | Kumar       |                       | MD, DM           | Postgraduate Institute of Medical Education and Research                                             | Chandigarh, India                        | Cohort investigator                                     | ICKD                                                                                       |
| April P                           | Carson      |                       | PhD              | University of Mississippi Medical Center, School of Medicine                                         | Jackson, MS                              | Cohort Principal Investigator                           | JHS                                                                                        |
| Bessie A                          | Young       |                       | MD, MPH          | University of Washington School of Medicine and VA Puget Sound Health Care System                    | Seattle, WA                              | Cohort investigator                                     | JHS                                                                                        |
| Clarissa                          | Diamantidis |                       | MD, MHS          | Duke University School of Medicine                                                                   | Durham, NC                               | Cohort investigator                                     | JHS                                                                                        |



## Supplemental Online Content: Nonauthor Collaborators

\*First name, last name, and suffix (if applicable) are required and will appear in PubMed.

| *First Name and Middle Initial(s) | *Last Name   | *Suffix (eg, Jr, III) | Academic Degrees | Institution                                                                                                                                           | Location (city, state/province, country) | Role or Contribution, eg, chair, principal investigator | Group (if more than 1 Group listed in the byline) and/or Subgroup (eg, Steering Committee) |
|-----------------------------------|--------------|-----------------------|------------------|-------------------------------------------------------------------------------------------------------------------------------------------------------|------------------------------------------|---------------------------------------------------------|--------------------------------------------------------------------------------------------|
| Yuan-I                            | Min          |                       | PhD              | University of Mississippi Medical Center, School of Medicine                                                                                          | Jackson, MS                              | Cohort investigator                                     | JHS                                                                                        |
| Tanjala S                         | Purnell      |                       | PhD, MPH         | Johns Hopkins Bloomberg School of Public Health                                                                                                       | Baltimore, MD                            | Cohort investigator                                     | JHS                                                                                        |
| Shizukiyo                         | Ishikawa     |                       | MD, PhD          | Jichi Medical University                                                                                                                              | Shimotsuke, JAPAN                        | cohort investigator                                     | JMS                                                                                        |
| Makiko                            | Mieno        |                       | PhD              | Jichi Medical University                                                                                                                              | Shimotsuke, JAPAN                        | cohort investigator                                     | JMS                                                                                        |
| Kunihiro                          | Yamagata     |                       | MD, PhD          | Institute of Medicine, University of Tsukuba                                                                                                          | Tsukuba, Ibaraki, Japan                  | cohort investigator                                     | J-SHC                                                                                      |
| Kunitoshi                         | Iseki        |                       | MD, PhD          | Nakamura Clinic                                                                                                                                       | Okinawa, Japan                           | cohort investigator                                     | J-SHC                                                                                      |
| Koichi                            | Asahi        |                       | MD, PhD          | School of Medicine, Iwate Medical University                                                                                                          | Iwate, Japan                             | cohort investigator                                     | J-SHC                                                                                      |
| Tsuneo                            | Konta        |                       | MD, PhD          | Yamagata University School of Medicine                                                                                                                | Yamagata, Japan                          | cohort investigator                                     | J-SHC                                                                                      |
| Brian J                           | Lee          |                       | MD               | Kaiser Permanente, Hawaii Region, and Moanalua Medical Center                                                                                         | Honolulu, Hawaii                         | Cohort Principal Investigator                           | KP Hawaii                                                                                  |
| Nigel J                           | Brunskill    |                       | MBChB, PhD       | University of Leicester                                                                                                                               | Leicester, UK                            | Cohort Principal Investigator                           | LCC                                                                                        |
| Laura                             | Gray         |                       | PhD              | University of Leicester                                                                                                                               | Leicester, UK                            | Collaborator                                            | LCC                                                                                        |
| Rupert                            | Major        |                       | MBChB, PhD       | University of Leicester                                                                                                                               | Leicester, UK                            | Collaborator                                            | LCC                                                                                        |
| James                             | Medcalf      |                       | MBChB, PhD       | University Hospitals of Leicester NHS Trust                                                                                                           | Leicester, UK                            | Collaborator                                            | LCC                                                                                        |
| Gabriel                           | Chodick      |                       | PhD              | School of Public Health Sackler, Faculty of Medicine; Maccabi Institute for Research and Innovation, Maccabi Healthcare Services, Tel Aviv University | Tel Aviv, Israel                         | Cohort Investigator                                     | Maccabi                                                                                    |
| Cheli                             | Melzer Cohen |                       | MSc              | Maccabi Institute for Research and Innovation, Maccabi Healthcare Services                                                                            | Tel Aviv, Israel                         | Cohort Investigator                                     | Maccabi                                                                                    |
| Jack FM                           | Wetzels      |                       | Prof, MD, PhD    | Radboud University Medical Center                                                                                                                     | Nijmegen, the Netherlands                | Cohort Investigator                                     | MASTERPLAN                                                                                 |

## Supplemental Online Content: Nonauthor Collaborators

\*First name, last name, and suffix (if applicable) are required and will appear in PubMed.

| *First Name and Middle Initial(s) | *Last Name  | *Suffix (eg, Jr, III) | Academic Degrees  | Institution                                                                                                   | Location (city, state/province, country) | Role or Contribution, eg, chair, principal investigator | Group (if more than 1 Group listed in the byline) and/or Subgroup (eg, Steering Committee) |
|-----------------------------------|-------------|-----------------------|-------------------|---------------------------------------------------------------------------------------------------------------|------------------------------------------|---------------------------------------------------------|--------------------------------------------------------------------------------------------|
| Peter J                           | Blankestijn |                       | MD, PhD           | Univeristy Medical Centre Utrecht                                                                             | Utrecht, the Netherlands                 | Cohort Investigator                                     | MASTERPLAN                                                                                 |
| Arjan D                           | van Zuilen  |                       | MD, PhD           | Univeristy Medical Centre Utrecht                                                                             | Utrecht, the Netherlands                 | Cohort Investigator                                     | MASTERPLAN                                                                                 |
| Lesley A                          | Inker       |                       | MD, MS            | Tufts University                                                                                              | Boston, MA                               | cohort investigator                                     | MDRD                                                                                       |
| Andrew S                          | Levey       |                       | MD                | Tufts University                                                                                              | Boston, MA                               | cohort investigator                                     | MDRD                                                                                       |
| Mark                              | Sarnak      |                       | MD                | Tufts University                                                                                              | Boston, MA                               | cohort investigator                                     | MDRD                                                                                       |
| Michael G                         | Shlipak     |                       | MD                | University of California, San Francisco                                                                       | San Francisco, CA                        | cohort investigator                                     | MESA                                                                                       |
| Joachim                           | Ix          |                       | MD, MAS           | University of California San Diego; Veterans Affairs San Diego Healthcare System                              | San Diego, CA, USA                       | cohort investigator                                     | MESA                                                                                       |
| Ian                               | de Boer     |                       | MD, MS            | University of Washington                                                                                      | Seattle, WA                              | cohort investigator                                     | MESA                                                                                       |
| Ronit                             | Katz        |                       | Dphil             | University of Washington                                                                                      | Seattle, WA                              | cohort investigator                                     | MESA                                                                                       |
| Florian                           | Kronenberg  |                       | MD                | Medical University of Innsbruck                                                                               | Innsbruck, Austria                       | cohort investigator                                     | MMKD                                                                                       |
| Barbara                           | Kollerits   |                       | PhD, MPH          | Medical University of Innsbruck                                                                               | Innsbruck, Austria                       | cohort investigator                                     | MMKD                                                                                       |
| Eberhard                          | Ritz        |                       | MD                | University of Heidelberg                                                                                      | Heidelberg, Germany                      | cohort investigator                                     | MMKD                                                                                       |
| Dorothea                          | Nitsch      |                       | MD, MSc<br>Dr med | London School of Hygiene & Tropical Medicine                                                                  | London, UK                               | Cohort Principal investigator                           | MRC Older Age                                                                              |
| Girish N                          | Nadkarni    |                       | MD, MPH           | Icahn School of Medicine at Mount Sinai                                                                       | New York, NY                             | Cohort Investigator                                     | Mt Sinai BioMe                                                                             |
| Lili                              | Chan        |                       | MD                | Icahn School of Medicine at Mount Sinai                                                                       | New York, NY                             | Cohort Investigator                                     | Mt Sinai BioMe                                                                             |
| Erwin P                           | Bottinger   |                       | MD                | Icahn School of Medicine at Mount Sinai                                                                       | New York, NY                             | Cohort Investigator                                     | Mt Sinai BioMe                                                                             |
| Wonsuk                            | Oh          |                       | PhD               | Icahn School of Medicine at Mount Sinai                                                                       | New York, NY                             | Cohort Investigator                                     | Mt Sinai BioMe                                                                             |
| Zhihong                           | Liu         |                       | MD                | National Clinical Research Center of Kidney Diseases, Jinling Hospital, Nanjing University School of Medicine | Nanjing, Jiangsu, China                  | Cohort Investigator                                     | Nanjing CKD                                                                                |

## Supplemental Online Content: Nonauthor Collaborators

\*First name, last name, and suffix (if applicable) are required and will appear in PubMed.

| *First Name and Middle Initial(s) | *Last Name     | *Suffix (eg, Jr, III) | Academic Degrees | Institution                                                                                                                                                              | Location (city, state/province, country) | Role or Contribution, eg, chair, principal investigator | Group (if more than 1 Group listed in the byline) and/or Subgroup (eg, Steering Committee) |
|-----------------------------------|----------------|-----------------------|------------------|--------------------------------------------------------------------------------------------------------------------------------------------------------------------------|------------------------------------------|---------------------------------------------------------|--------------------------------------------------------------------------------------------|
| Haitao                            | Zhang          |                       | MD               | National Clinical Research Center of Kidney Diseases, Jinling Hospital, Nanjing University School of Medicine                                                            | Nanjing, Jiangsu, China                  | Cohort Investigator                                     | Nanjing CKD                                                                                |
| Lihua                             | Zhang          |                       | MD, PhD          | National Clinical Research Center of Kidney Diseases, Jinling Hospital, Nanjing University School of Medicine                                                            | Nanjing, Jiangsu, China                  | Cohort Investigator                                     | Nanjing CKD                                                                                |
| Jose M                            | Valdivielso    |                       | PhD              | IRBLleida. Biomedical Research Institute of Lleida                                                                                                                       | Lleida, Spain                            | Cohort Principal Investigator                           | Nefrona                                                                                    |
| Marcelino                         | Bermudez-Lopez |                       | Md, PhD          | IRBLleida. Biomedical Research Institute of Lleida                                                                                                                       | Lleida, Spain                            | Collaborator                                            | Nefrona                                                                                    |
| Milica                            | Bozic          |                       | PhD              | IRBLleida. Biomedical Research Institute of Lleida                                                                                                                       | Lleida, Spain                            | Collaborator                                            | Nefrona                                                                                    |
| Maite                             | Caus           |                       | PhD              | IRBLleida. Biomedical Research Institute of Lleida                                                                                                                       | Lleida, Spain                            | Collaborator                                            | Nefrona                                                                                    |
| Juan Miguel                       | Diaz-Tocados   |                       | PhD              | IRBLleida. Biomedical Research Institute of Lleida                                                                                                                       | Lleida, Spain                            | Collaborator                                            | Nefrona                                                                                    |
| Benedicte                         | Stengel        |                       | PhD, MD          | Centre for research in Epidemiology and Population Health (CESP), Paris-Saclay University, Inserm U1018, Versailles Saint-Quentin University, Clinical Epidemiology Team | Villejuif, France                        | In charge of the cohort's study data                    | NephroTest                                                                                 |
| Marie                             | Metzger        |                       | PhD              | Centre for research in Epidemiology and Population Health (CESP), Paris-Saclay University, Inserm U1018, Versailles Saint-Quentin University, Clinical Epidemiology Team | Villejuif, France                        | Cohort Steering committee member                        | NephroTest                                                                                 |
| Yingying                          | Sang           |                       | MSc              | Johns Hopkins Bloomberg School of Public Health                                                                                                                          | Baltimore, MD                            | cohort investigator                                     | NHANES                                                                                     |

## Supplemental Online Content: Nonauthor Collaborators

\*First name, last name, and suffix (if applicable) are required and will appear in PubMed.

| *First Name and Middle Initial(s) | *Last Name | *Suffix (eg, Jr, III) | Academic Degrees | Institution                                   | Location (city, state/province, country) | Role or Contribution, eg, chair, principal investigator | Group (if more than 1 Group listed in the byline) and/or Subgroup (eg, Steering Committee) |
|-----------------------------------|------------|-----------------------|------------------|-----------------------------------------------|------------------------------------------|---------------------------------------------------------|--------------------------------------------------------------------------------------------|
| Katsuyuki                         | Miura      |                       | MD, PhD          | Shiga University of Medical Science           | Otsu, Shiga, Japan                       | Cohort Co-Chair                                         | NIPPON DATA80                                                                              |
| Hirotsugu                         | Ueshima    |                       | MD, PhD          | Shiga University of Medical Science           | Otsu, Shiga, Japan                       | Cohort Chair                                            | NIPPON DATA80                                                                              |
| Akira                             | Okayama    |                       | MD, PhD          | Research Institute of Strategy for Prevention | Tokyo, Japan                             | Cohort Co-Chair                                         | NIPPON DATA80                                                                              |
| Aya                               | Kadota     |                       | MD, PhD          | Shiga University of Medical Science           | Otsu, Shiga, Japan                       | Cohort Executive director                               | NIPPON DATA80                                                                              |
| Katsuyuki                         | Miura      |                       | MD, PhD          | Shiga University of Medical Science           | Otsu, Shiga, Japan                       | Cohort Co-Chair                                         | NIPPON DATA90                                                                              |
| Hirotsugu                         | Ueshima    |                       | MD, PhD          | Shiga University of Medical Science           | Otsu, Shiga, Japan                       | Cohort Chair                                            | NIPPON DATA90                                                                              |
| Tomonori                          | Okamura    |                       | MD, PhD          | Keio University, School of Medicine           | Tokyo, Japan                             | Cohort Co-Chair                                         | NIPPON DATA90                                                                              |
| Aya                               | Kadota     |                       | MD, PhD          | Shiga University of Medical Science           | Otsu, Shiga, Japan                       | Cohort executive director                               | NIPPON DATA90                                                                              |
| Laura                             | Sola       |                       | MD               | Centro de Hemodiálisis Crónica, CASMU-IAMPP   | Montevideo, Uruguay                      | Cohort Investigator                                     | NRHP-URU                                                                                   |
| Alejandro                         | Ferreiro   |                       | MD               | Universidad de la República                   | Montevideo, Uruguay                      | Cohort Investigator                                     | NRHP-URU                                                                                   |
| Jose                              | Santiago   |                       | MD               | Universidad de la República                   | Montevideo, Uruguay                      | Cohort Investigator                                     | NRHP-URU                                                                                   |
| Pablo                             | Rios       |                       | MD               | Fondo Nacional de Recursos                    | Montevideo, Uruguay                      | Cohort Investigator                                     | NRHP-URU                                                                                   |
| Liliana                           | Gadola     |                       | MD               | Universidad de la República                   | Montevideo, Uruguay                      | Cohort Investigator                                     | NRHP-URU                                                                                   |
| Ricardo                           | Silvariño  |                       | MD, MSc          | Universidad de la República                   | Montevideo, Uruguay                      | Cohort Investigator                                     | NRHP-URU                                                                                   |
| Takayoshi                         | Ohkubo     |                       | MD, PhD          | Teikyo University School of Medicine          | Tokyo, Japan                             | Cohort Principal investigator                           | Ohasama                                                                                    |
| Michihiro                         | Satoh      |                       | PhD              | Tohoku Medical and Pharmaceutical University  | Sendai, Japan                            | Cohort Investigator                                     | Ohasama                                                                                    |
| Hirohito                          | Metoki     |                       | MD, PhD          | Tohoku Medical and Pharmaceutical University  | Sendai, Japan                            | Cohort Investigator                                     | Ohasama                                                                                    |
| Masahiro                          | Kikuya     |                       | MD, PhD          | Teikyo University School of Medicine          | Tokyo, Japan                             | Cohort Investigator                                     | Ohasama                                                                                    |
| Kunitoshi                         | Iseki      |                       | MD, PhD          | Nakamura Clinic                               | Urasoe, Okinawa, Japan                   | Cohort investigator                                     | Okinawa                                                                                    |

## Supplemental Online Content: Nonauthor Collaborators

\*First name, last name, and suffix (if applicable) are required and will appear in PubMed.

| *First Name and Middle Initial(s) | *Last Name | *Suffix (eg, Jr, III) | Academic Degrees | Institution                                                                                                                           | Location (city, state/province, country)               | Role or Contribution, eg, chair, principal investigator | Group (if more than 1 Group listed in the byline) and/or Subgroup (eg, Steering Committee) |
|-----------------------------------|------------|-----------------------|------------------|---------------------------------------------------------------------------------------------------------------------------------------|--------------------------------------------------------|---------------------------------------------------------|--------------------------------------------------------------------------------------------|
| Elizabeth                         | Ciemins    |                       | PhD, MPH, MA     | American Medical Group Association                                                                                                    | Alexandria, VA                                         | Cohort Data acquisition, administrative support         | OLDW                                                                                       |
| Jeff                              | Mohl       |                       | PhD              | American Medical Group Association                                                                                                    | Alexandria, VA                                         | Cohort Data acquisition, administrative support         | OLDW                                                                                       |
| Robert G                          | Nelson     |                       | MD, PhD          | National Institute of Diabetes and Digestive and Kidney Diseases                                                                      | Phoenix, AZ                                            | Cohort Investigator                                     | Pima                                                                                       |
| Robert L                          | Hanson     |                       | MD, MPH          | National Institute of Diabetes and Digestive and Kidney Diseases                                                                      | Phoenix, AZ                                            | Cohort Investigator                                     | Pima                                                                                       |
| Helen C                           | Looker     |                       | MBBS             | National Institute of Diabetes and Digestive and Kidney Diseases                                                                      | Phoenix, AZ                                            | Cohort Investigator                                     | Pima                                                                                       |
| Ron T                             | Gansevoort |                       | MD, PhD          | University Medical Center Groningen                                                                                                   | Groningen, The Netherlands                             | Cohort Investigator                                     | PREVEND                                                                                    |
| Lyanne M                          | Kieneker   |                       | MSc              | University Medical Center Groningen                                                                                                   | Groningen, The Netherlands                             | Cohort Investigator                                     | PREVEND                                                                                    |
| Stephan JL                        | Bakker     |                       | MD, PhD          | University Medical Center Groningen                                                                                                   | Groningen, The Netherlands                             | Cohort Investigator                                     | PREVEND                                                                                    |
| Olivier                           | Moranne    |                       | MD, PhD          | IDESP University Montpellier; University Hospital Nimes, France                                                                       | France                                                 | Cohort Principal Investigator                           | PSPA                                                                                       |
| Cecile                            | Couchoud   |                       | MD               | Registre REIN, Agence de la Biomedecine; 5CNRS, UMR 5558, Laboratoire de Biométrie et Biologie Evolutive, Equipe Biostatistique Santé | Saint-Denis La Plaine, France and Villeurbanne, France | Cohort Investigator                                     | PSPA                                                                                       |
| Nigel J                           | Brunskill  |                       | MBChB, PhD       | University of Leicester                                                                                                               | Leicester, UK                                          | Cohort Principal Investigator                           | PSP-CKD                                                                                    |

## Supplemental Online Content: Nonauthor Collaborators

\*First name, last name, and suffix (if applicable) are required and will appear in PubMed.

| *First Name and Middle Initial(s) | *Last Name | *Suffix (eg, Jr, III) | Academic Degrees | Institution                                                              | Location (city, state/province, country) | Role or Contribution, eg, chair, principal investigator | Group (if more than 1 Group listed in the byline) and/or Subgroup (eg, Steering Committee) |
|-----------------------------------|------------|-----------------------|------------------|--------------------------------------------------------------------------|------------------------------------------|---------------------------------------------------------|--------------------------------------------------------------------------------------------|
| Rupert                            | Major      |                       | MBChB, PhD       | University of Leicester                                                  | Leicester, UK                            | Collaborator                                            | PSP-CKD                                                                                    |
| David                             | Shepherd   |                       | MBChB            | University of Leicester                                                  | Leicester, UK                            | Collaborator                                            | PSP-CKD                                                                                    |
| James                             | Medcalf    |                       | MBChB, PhD       | University Hospitals of Leicester NHS Trust                              | Leicester, UK                            | Collaborator                                            | PSP-CKD                                                                                    |
| Simerjot K                        | Jassal     |                       | MD               | VA San Diego, UCSD                                                       | San Diego, CA, USA                       | Cohort Investigator                                     | Rancho Bernardo                                                                            |
| Jaclyn                            | Bergstrom  |                       | MS               | UCSD                                                                     | La Jolla, CA, USA                        | Cohort Investigator                                     | Rancho Bernardo                                                                            |
| Joachim                           | Ix         |                       | MD               | UCSD, VA San Diego                                                       | San Diego, CA, USA                       | Cohort Investigator                                     | Rancho Bernardo                                                                            |
| Csaba P                           | Kovesdy    |                       | MD               | University of Tennessee Health Science Center, Memphis VA Medical Center | Memphis, TN                              | Cohort Co-Investigator                                  | RCAV                                                                                       |
| Keiichi                           | Sumida     |                       | MD, MPH, PhD     | University of Tennessee Health Science Center                            | Memphis, TN                              | Cohort Co-Investigator                                  | RCAV                                                                                       |
| Prabin                            | Shrestha   |                       | MS, PhD          | University of Tennessee Health Science Center                            | Memphis, TN                              | Cohort Co-Investigator                                  | RCAV                                                                                       |
| Orlando                           | Gutierrez  |                       | MD               | UAB                                                                      | Birmingham, AL                           | Cohort co-investigator                                  | REGARDS                                                                                    |
| Katharine                         | Cheung     |                       | MD, PHD          | University of Vermont                                                    | Burlington, VT                           | Cohort co-investigator                                  | REGARDS                                                                                    |
| Paul                              | Muntner    |                       | PhD              | UAB                                                                      | Birmingham, AL                           | Cohort co-investigator                                  | REGARDS                                                                                    |
| Titi                              | Ilori      |                       | MD               | Boston University                                                        | Boston, MA                               | Cohort co-investigator                                  | REGARDS                                                                                    |
| Michelle                          | Pena       |                       | PhD              | University of Groningen, University Medical Center Groningen             | Groningen, The Netherlands               | Cohort Investigator                                     | RENAAL                                                                                     |
| Hiddo JL                          | Heerspink  |                       | PhD              | University of Groningen, University Medical Center Groningen             | Groningen, The Netherlands               | Cohort Investigator                                     | RENAAL                                                                                     |
| Edouard L                         | Fu         |                       | PhD              | Brigham and Women's Hospital and Harvard Medical School                  | Boston, MA, USA                          | Cohort Investigator                                     | SCREAM                                                                                     |
| Carl-Gustaf                       | Elinder    |                       | MD, PhD          | Karolinska Institute                                                     | Stockholm, Sweden                        | Cohort Investigator                                     | SCREAM                                                                                     |
| Peter                             | Barany     |                       | MD, PhD          | Karolinska Institute                                                     | Stockholm, Sweden                        | Cohort Investigator                                     | SCREAM                                                                                     |

## Supplemental Online Content: Nonauthor Collaborators

\*First name, last name, and suffix (if applicable) are required and will appear in PubMed.

| *First Name and Middle Initial(s) | *Last Name  | *Suffix (eg, Jr, III) | Academic Degrees | Institution                                                                                                                                                                            | Location (city, state/province, country) | Role or Contribution, eg, chair, principal investigator | Group (if more than 1 Group listed in the byline) and/or Subgroup (eg, Steering Committee) |
|-----------------------------------|-------------|-----------------------|------------------|----------------------------------------------------------------------------------------------------------------------------------------------------------------------------------------|------------------------------------------|---------------------------------------------------------|--------------------------------------------------------------------------------------------|
| Juan J                            | Carrero     |                       | PharmD, PhD      | Karolinska Institute                                                                                                                                                                   | Stockholm, Sweden                        | Cohort Principal Investigator                           | SCREAM                                                                                     |
| Marie                             | Evans       |                       | MD, PhD          | Karolinska Institute                                                                                                                                                                   | Stockholm, Sweden                        | Cohort Investigator                                     | SCREAM                                                                                     |
| Charumathi                        | Sabanayagam |                       | MD, PhD          | Singapore Eye Research Institute and Duke-NUS Medical School                                                                                                                           | Singapore                                | Cohort Investigator                                     | SEED                                                                                       |
| Ching-Yu                          | Cheng       |                       | MD, PhD          | Singapore Eye Research Institute and National University of Singapore                                                                                                                  | Singapore                                | Cohort Investigator                                     | SEED                                                                                       |
| Tien Yin                          | Wong        |                       | MD, PhD          | Singapore Eye Research Institute and Duke-NUS Medical School                                                                                                                           | Singapore                                | Cohort Investigator                                     | SEED                                                                                       |
| Crystal Chong Chun                | Yuen        |                       | BSc              | Singapore Eye Research Institute                                                                                                                                                       | Singapore                                | Cohort Investigator                                     | SEED                                                                                       |
| William                           | Herrington  |                       | FRCP             | Medical Research Council Population Health Research Unit, Clinical Trial Service Unit and Epidemiological Studies Unit, Nuffield Department of Population Health, University of Oxford | Oxford                                   | Cohort Investigator                                     | SHARP                                                                                      |
| Natalie                           | Staplin     |                       | PhD              | Medical Research Council Population Health Research Unit, Clinical Trial Service Unit and Epidemiological Studies Unit, Nuffield Department of Population Health, University of Oxford | Oxford                                   | Lead Statisticians                                      | SHARP                                                                                      |

## Supplemental Online Content: Nonauthor Collaborators

\*First name, last name, and suffix (if applicable) are required and will appear in PubMed.

| *First Name and Middle Initial(s) | *Last Name  | *Suffix (eg, Jr, III) | Academic Degrees | Institution                                                                                                                                                                            | Location (city, state/province, country) | Role or Contribution, eg, chair, principal investigator | Group (if more than 1 Group listed in the byline) and/or Subgroup (eg, Steering Committee) |
|-----------------------------------|-------------|-----------------------|------------------|----------------------------------------------------------------------------------------------------------------------------------------------------------------------------------------|------------------------------------------|---------------------------------------------------------|--------------------------------------------------------------------------------------------|
| Martin J                          | Landray     |                       | FMedSci          | Medical Research Council Population Health Research Unit, Clinical Trial Service Unit and Epidemiological Studies Unit, Nuffield Department of Population Health, University of Oxford | Oxford                                   | Co-Principal Investigator                               | SHARP                                                                                      |
| Colin                             | Baigent     |                       | FMedSci          | Medical Research Council Population Health Research Unit, Clinical Trial Service Unit and Epidemiological Studies Unit, Nuffield Department of Population Health, University of Oxford | Oxford                                   | Co-Principal Investigator                               | SHARP                                                                                      |
| Philip                            | Kalra       |                       | MD               | Salford Royal Hospital, Northern Care Alliance NHS Foundation Trust; University of Manchester                                                                                          | Salford, UK                              | Cohort Principal Investigator                           | SKS                                                                                        |
| Rajkumar                          | Chinnadurai |                       | PhD              | Salford Royal Hospital, Northern Care Alliance NHS Foundation Trust; University of Manchester                                                                                          | Salford, UK                              | Cohort Investigator                                     | SKS                                                                                        |
| Darren                            | Green       |                       | PhD              | Salford Royal Hospital, Northern Care Alliance NHS Foundation Trust; University of Manchester                                                                                          | Salford, UK                              | Cohort Investigator                                     | SKS                                                                                        |
| Smeeta                            | Sinha       |                       | PhD              | Salford Royal Hospital, Northern Care Alliance NHS Foundation Trust; University of Manchester                                                                                          | Salford, UK                              | Cohort Investigator                                     | SKS                                                                                        |
| James                             | Ritchie     |                       | PhD              | Salford Royal Hospital, Northern Care Alliance NHS Foundation Trust; University of Manchester                                                                                          | Salford, UK                              | Cohort Investigator                                     | SKS                                                                                        |



## Supplemental Online Content: Nonauthor Collaborators

\*First name, last name, and suffix (if applicable) are required and will appear in PubMed.

| *First Name and Middle Initial(s) | *Last Name | *Suffix (eg, Jr, III) | Academic Degrees | Institution                                                                         | Location (city, state/province, country) | Role or Contribution, eg, chair, principal investigator | Group (if more than 1 Group listed in the byline) and/or Subgroup (eg, Steering Committee) |
|-----------------------------------|------------|-----------------------|------------------|-------------------------------------------------------------------------------------|------------------------------------------|---------------------------------------------------------|--------------------------------------------------------------------------------------------|
| Frank LJ                          | Visseren   |                       | MD, PhD          | University Medical Center Utrecht                                                   | Utrecht, the Netherlands                 | Cohort Investigator                                     | SMART                                                                                      |
| Pascal                            | Burger     |                       | MD               | University Medical Center Utrecht                                                   | Utrecht, the Netherlands                 | Cohort Investigator                                     | SMART                                                                                      |
| Marielle                          | Emmelot    |                       | MD, PhD          | University Medical Center Utrecht                                                   | Utrecht, the Netherlands                 | Cohort Investigator                                     | SMART                                                                                      |
| Berend                            | van Welzen |                       | MD, PhD          | University Medical Center Utrecht                                                   | Utrecht, the Netherlands                 | Cohort Investigator                                     | SMART                                                                                      |
| Marie                             | Evans      |                       | MD, PhD          | Department of clinical intervention and technology (CLINTEC), Karolinska Institutet | Stockholm, Sweden                        | Cohort Investigator                                     | SRR-CKD                                                                                    |
| Vivekanand                        | Jha        |                       | MD, PhD          | George Institute for Global Health India                                            | New Delhi, India                         | Cohort Investigator                                     | STOP-CKDu                                                                                  |
| Oommen                            | John       |                       | MD               | George Institute for Global Health India                                            | New Delhi, India                         | Cohort Investigator                                     | STOP-CKDu                                                                                  |
| Balaji                            | Gummidi    |                       | MDS              | George Institute for Global Health India                                            | New Delhi, India                         | Cohort Investigator                                     | STOP-CKDu                                                                                  |
| Arpita                            | Ghosh      |                       | PhD              | George Institute for Global Health India                                            | New Delhi, India                         | Cohort Investigator                                     | STOP-CKDu                                                                                  |
| David                             | Naimark    |                       | MD, MSc          | University of Toronto                                                               | Toronto, Ontario                         | Cohort Co-PI                                            | Sunnybrook                                                                                 |
| Navdeep                           | Tangri     |                       | MD, PhD          | University of Manitoba                                                              | Winnipeg, Manitoba                       | Cohort Co-PI                                            | Sunnybrook                                                                                 |
| Chi-Pang                          | Wen        |                       | MD, DrPH         | China Medical University Hospital                                                   | Taiwan                                   | Cohort PI                                               | Taiwan MJ                                                                                  |
| Min-Kuang                         | Tsai       |                       | MS               | National Health Research Institutes                                                 | Taiwan                                   | Cohort Investigator                                     | Taiwan MJ                                                                                  |
| Yoshiyuki                         | Ueno       |                       | MD, PhD          | Yamagata University School of Medicine                                              | Yamagata, Japan                          | Cohort Investigator                                     | Takahata                                                                                   |
| Tsuneo                            | Konta      |                       | MD, PhD          | Yamagata University School of Medicine                                              | Yamagata, Japan                          | Cohort Investigator                                     | Takahata                                                                                   |
| Masafumi                          | Watanabe   |                       | MD, PhD          | Yamagata University School of Medicine                                              | Yamagata, Japan                          | Cohort Investigator                                     | Takahata                                                                                   |
| Kazunobu                          | Ichikawa   |                       | MD, PhD          | Yamagata University School of Medicine                                              | Yamagata, Japan                          | Cohort Investigator                                     | Takahata                                                                                   |
| Mohammadhassan                    | Mirbolouk  |                       | MD               | Johns Hopkins Hospital                                                              | Baltimore, MD                            | Cohort Investigator                                     | TLGS                                                                                       |
| Fereidoun                         | Azizi      |                       | MD               | Shahid Beheshti University of Medical Sciences                                      | Iran                                     | Cohort Investigator                                     | TLGS                                                                                       |
| Farzad                            | Hadaegh    |                       | MD               | Shahid Beheshti University of Medical Sciences                                      | Iran                                     | Cohort Investigator                                     | TLGS                                                                                       |

## Supplemental Online Content: Nonauthor Collaborators

\*First name, last name, and suffix (if applicable) are required and will appear in PubMed.

| *First Name and Middle Initial(s) | *Last Name   | *Suffix (eg, Jr, III) | Academic Degrees | Institution                                         | Location (city, state/province, country) | Role or Contribution, eg, chair, principal investigator | Group (if more than 1 Group listed in the byline) and/or Subgroup (eg, Steering Committee) |
|-----------------------------------|--------------|-----------------------|------------------|-----------------------------------------------------|------------------------------------------|---------------------------------------------------------|--------------------------------------------------------------------------------------------|
| Farhad                            | Hosseinpanah |                       | MD               | Shahid Beheshti University of Medical Sciences      | Iran                                     | Cohort Investigator                                     | TLGS                                                                                       |
| Yingying                          | Sang         |                       | MSc              | Johns Hopkins Bloomberg School of Public Health     | Baltimore, MD                            | Cohort Investigator                                     | UK Biobank                                                                                 |
| Wen                               | Shi          |                       | MSc              | Johns Hopkins Medicine                              | Baltimore, MD                            | Cohort Investigator                                     | UK Biobank                                                                                 |
| Dan                               | Arking       |                       | PhD              | Johns Hopkins University                            | Baltimore, MD                            | Cohort Investigator                                     | UK Biobank                                                                                 |
| Johan                             | Ärnlöv       |                       | MD, PhD          | Karolinksa Institutet                               | Huddinge, Sweden                         | Cohort Investigator                                     | ULSAM                                                                                      |
| Anders                            | Larsson      |                       | MD, PhD          | Uppsala University                                  | Uppsala, Sweden                          | Cohort Investigator                                     | ULSAM                                                                                      |
| Vilmantas                         | Giedraitis   |                       | PhD              | Uppsala University                                  | Uppsala, Sweden                          | Cohort Investigator                                     | ULSAM                                                                                      |
| Patrick                           | Mark         |                       | MBChB, PhD       | University of Glasgow                               | Glasgow, UK                              | Cohort Investigator                                     | West of Scotland                                                                           |
| Jamie                             | Traynor      |                       | MBChB, PhD       | NHS Greater Glasgow and Clyde                       | Glasgow, UK                              | Cohort Investigator                                     | West of Scotland                                                                           |
| Michael                           | Sullivan     |                       | MBChB, PhD       | University of Glasgow                               | Glasgow, UK                              | Cohort Investigator                                     | West of Scotland                                                                           |
| Jennifer                          | Lees         |                       | MBChB, PhD       | University of Glasgow                               | Glasgow, UK                              | Cohort Investigator                                     | West of Scotland                                                                           |
| Jae won                           | Yang         |                       | MD, PhD          | Yonsei University Wonju College of Medicine         | Wonju, Korea                             | Cohort Investigator                                     | YWSCC                                                                                      |
| Jae il                            | Shin         |                       | MD, PhD          | Yonsei University College of Medicine               | Seoul, Korea                             | Cohort Investigator                                     | YWSCC                                                                                      |
| Jun young                         | Lee          |                       | MD, PhD          | Yonsei University Wonju College of Medicine         | Wonju, Korea                             | Cohort Investigator                                     | YWSCC                                                                                      |
| Jae seok                          | Kim          |                       | MD, PhD          | Yonsei University Wonju College of Medicine         | Wonju, Korea                             | Cohort Investigator                                     | YWSCC                                                                                      |
| Henk JG                           | Bilo         |                       | MD, PhD          | University Medical Center Groningen the Netherlands | Groningen, The Netherlands               | Cohort Investigator                                     | ZODIAC                                                                                     |
| Peter                             | van Dijk     |                       | MD, PhD          | University Medical Center Groningen the Netherlands | Groningen, The Netherlands               | Cohort Investigator                                     | ZODIAC                                                                                     |
| Mireille                          | Edens        |                       | PhD              | Isala Academy Zwolle the Netherlands                | Zwolle, The Netherlands                  | Cohort Investigator                                     | ZODIAC                                                                                     |
| Joep                              | Dille        |                       |                  | Isala Academy Zwolle the Netherlands                | Zwolle, The Netherlands                  | Cohort Investigator                                     | ZODIAC                                                                                     |

## Supplemental Online Content: Nonauthor Collaborators

\*First name, last name, and suffix (if applicable) are required and will appear in PubMed.

| *First Name and Middle Initial(s) | *Last Name | *Suffix (eg, Jr, III) | Academic Degrees  | Institution                                     | Location (city, state/province, country) | Role or Contribution, eg, chair, principal investigator | Group (if more than 1 Group listed in the byline) and/or Subgroup (eg, Steering Committee) |
|-----------------------------------|------------|-----------------------|-------------------|-------------------------------------------------|------------------------------------------|---------------------------------------------------------|--------------------------------------------------------------------------------------------|
| Josef                             | Coresh     |                       | MD, PhD           | Johns Hopkins Bloomberg School of Public Health | Baltimore, MD                            | Chair                                                   | CKD-PC Steering Committee                                                                  |
| Shoshana H                        | Ballew     |                       | PhD               | Johns Hopkins Bloomberg School of Public Health | Baltimore, MD                            | Committee Member                                        | CKD-PC Steering Committee                                                                  |
| Juan-Jesus                        | Carrero    |                       | PharmD, PhD       | Karolinska Institute                            | Stockholm, Sweden                        | Committee Member                                        | CKD-PC Steering Committee                                                                  |
| Ron T                             | Gansevoort |                       | MD, PhD           | University Medical Center Groningen             | Groningen, The Netherlands               | Committee Member                                        | CKD-PC Steering Committee                                                                  |
| Morgan E                          | Grams      |                       | MD, PhD           | New York University Grossman School of Medicine | New York, NY                             | Committee Member                                        | CKD-PC Steering Committee                                                                  |
| Andrew S                          | Levey      |                       | PhD               | Tufts Medical Center                            | Boston, MA                               | Committee Member                                        | CKD-PC Steering Committee                                                                  |
| Dorothea                          | Nitsch     |                       | MD, MSc<br>Dr med | London School of Hygiene & Tropical Medicine    | London, UK                               | Committee Member                                        | CKD-PC Steering Committee                                                                  |
| Michael G                         | Shlipak    |                       | MD                | University of California, San Francisco         | San Francisco, CA                        | Committee Member                                        | CKD-PC Steering Committee                                                                  |
| Angela Yee-Moon                   | Wang       |                       | MD, PhD           | Queen Mary Hospital, University of Hong Kong    | Hong Kong SAR, China                     | Committee Member                                        | CKD-PC Steering Committee                                                                  |
| Shoshana H                        | Ballew     |                       | PhD               | Johns Hopkins Bloomberg School of Public Health | Baltimore, MD                            | Assistant Project Director                              | CKD-PC Data Coordinating Center                                                            |
| Jingsha                           | Chen       |                       | MSc               | Johns Hopkins Bloomberg School of Public Health | Baltimore, MD                            | Programmer                                              | CKD-PC Data Coordinating Center                                                            |
| Josef                             | Coresh     |                       | MD, PhD           | Johns Hopkins Bloomberg School of Public Health | Baltimore, MD                            | Co-Principal Investigator                               | CKD-PC Data Coordinating Center                                                            |
| Morgan E                          | Grams      |                       | MD, PhD           | New York University Grossman School of Medicine | New York, NY                             | Co-Principal Investigator                               | CKD-PC Data Coordinating Center                                                            |
| Kunihiro                          | Matsushita |                       | MD, PhD           | Johns Hopkins Bloomberg School of Public Health | Baltimore, MD                            | Director                                                | CKD-PC Data Coordinating Center                                                            |
| Yingying                          | Sang       |                       | MSc               | Johns Hopkins Bloomberg School of Public Health | Baltimore, MD                            | Lead Programmer                                         | CKD-PC Data Coordinating Center                                                            |
| Aditya                            | Surapaneni |                       | PhD               | New York University Grossman School of Medicine | New York, NY                             | Programmer                                              | CKD-PC Data Coordinating Center                                                            |
