# Supplementary material
Source: PubMed Central journal article supplement (PMC10548311)
Supplement: jama-e2317002-s004.pdf [file jama-e2317002-s004.pdf]

## Data Sharing Statement

Grams. Estimated Glomerular Filtration Rate, Albuminuria, and Adverse Outcomes. *JAMA*.  
Published October 03, 2023. doi:10.1001/jama.2023.17002

### Data

**Data available:** No

### Additional Information

**Explanation for why data not available:** Under agreement with the participating cohorts, CKD-PC cannot share individual data with third parties. Inquiries regarding specific analyses should be made to [ckdpc@jhmi.edu](mailto:ckdpc@jhmi.edu). Investigators may approach the original cohorts regarding their own policies for data sharing (e.g., <https://sites.csc.unc.edu/aric/distribution-agreements> for the Atherosclerosis Risk in Communities Study).
